# Supplementary material
Source: Springer Nature journal article supplement (https://www.springermedizin.de/resource/supplementary/13058_2011_2905_MOESM2_ESM.pdf/9702812)

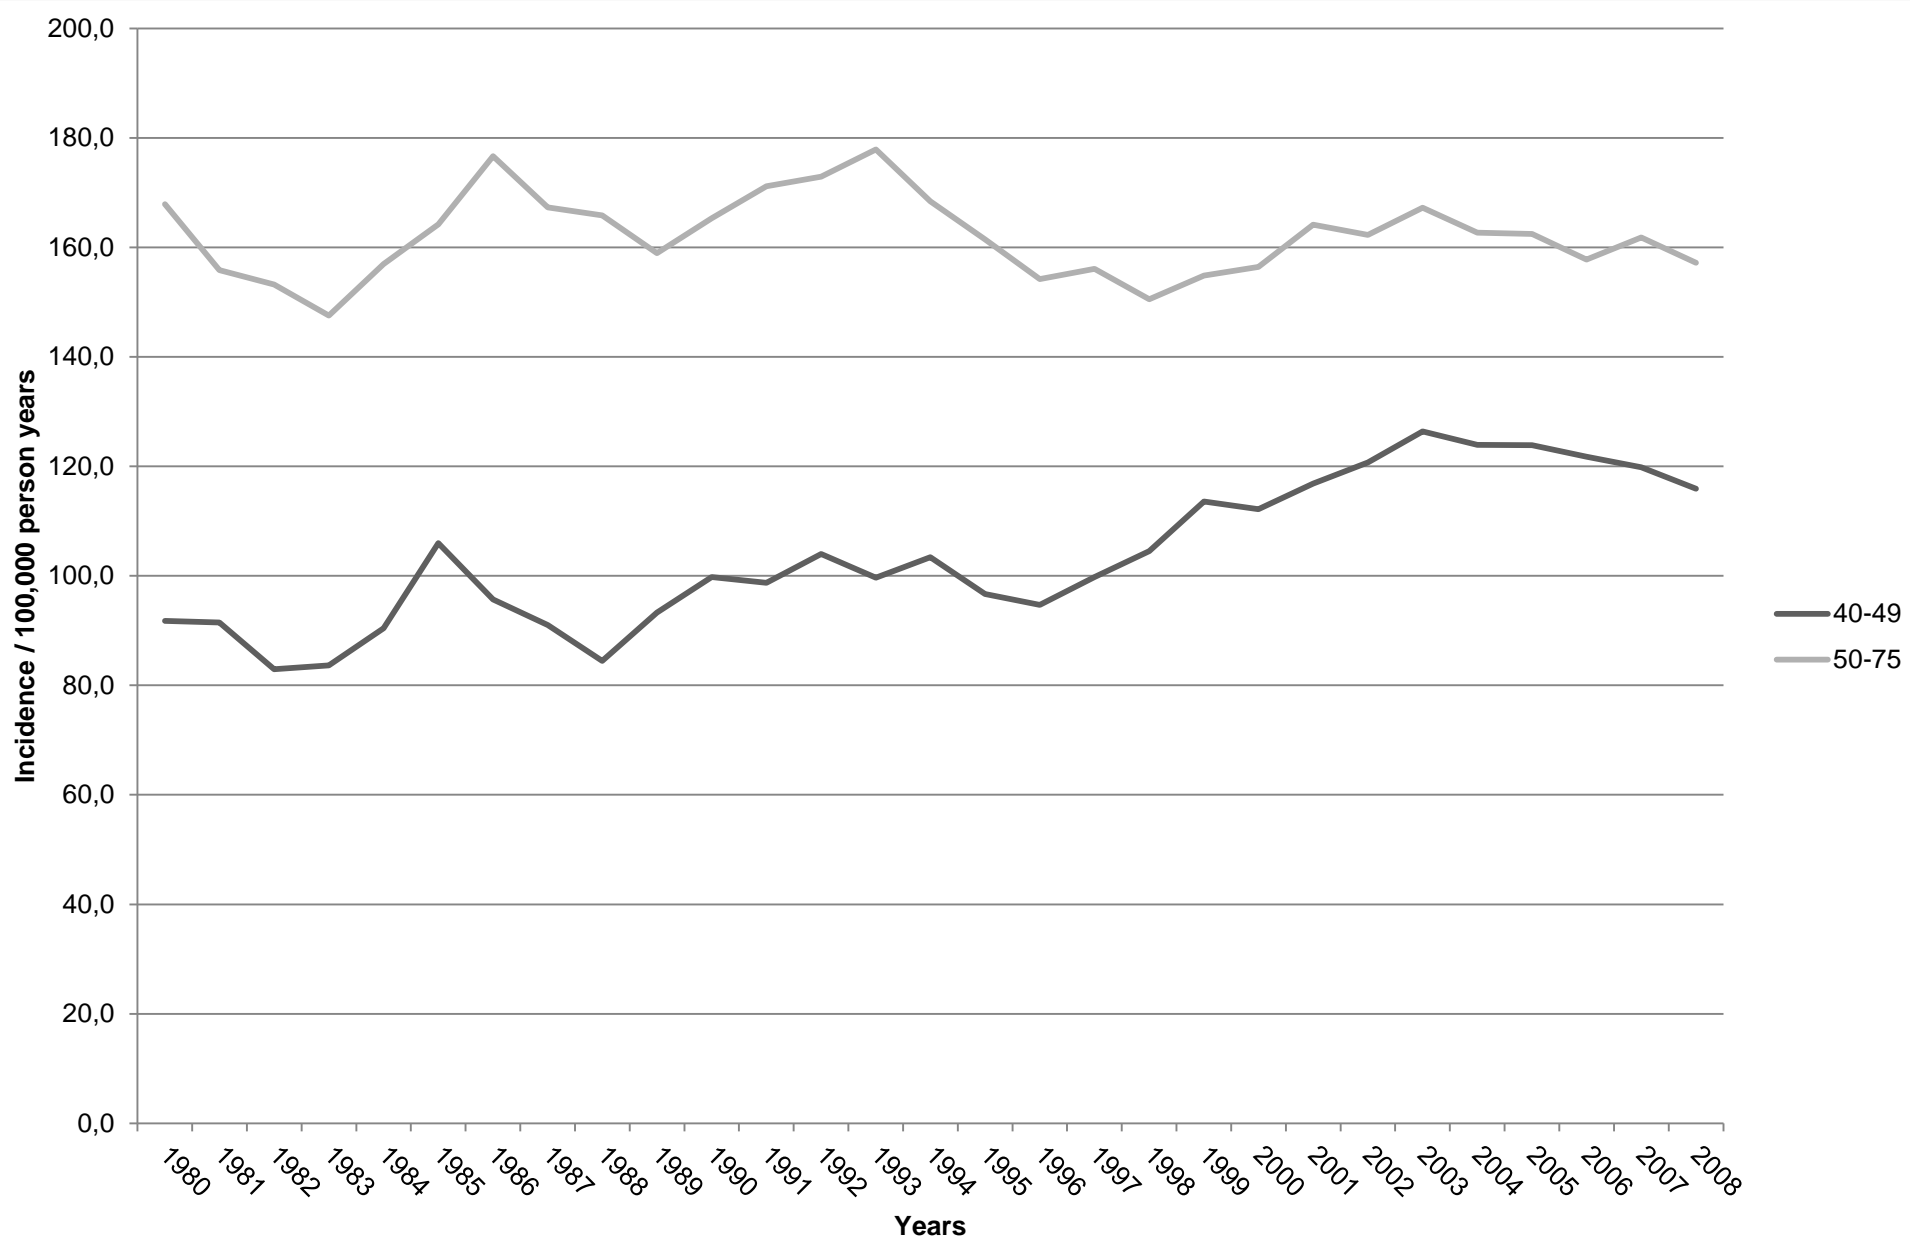

Supplement: MOESM2 [file 9702812]
